# Supplementary material
Source: publisher figshare collection journal article supplement (https://diabetesjournals.figshare.com/ndownloader/files/24720152)
Supplement: Supplementary file 1 [file 24720152]

## **Supplementary Appendix**

Supplement to:

Sara Charleer, Christophe De Block, Frank Nobels, Régis P. Radermecker, Ine Lowyck, Annelies Mullens, Denis Scarnière, Katrien Spincemaille, Marie Strivay, Eric Weber, Youri Taes, Chris Vercammen, Bart Keymeulen, Chantal Mathieu, Pieter Gillard.

Sustained impact of real-time continuous glucose monitoring in adults with type 1 diabetes on insulin pump therapy: Results after 24 months RESCUE study

This appendix has been provided by the authors to give readers additional information about their work.

## Table of contents

|                                                                                               | Page |
|-----------------------------------------------------------------------------------------------|------|
| Table S1: Overview of insulin pumps and glucose sensors                                       | 3    |
| Table S2 Overview of completeness of data per variable and time point                         | 3    |
| Table S3: Number of people in each subgroup                                                   | 4    |
| Table S4: Baseline characteristics                                                            | 5    |
| Table S5: Quality of life                                                                     | 6    |
| Table S6: People meeting glycemic targets with and without impaired awareness of hypoglycemia | 7    |
| Figure S1: Overview of people with type 1 diabetes in the rtCGM reimbursement program         | 8    |
| List of RESCUE investigators                                                                  | 9    |

**Table S1. Overview of insulin pumps and glucose sensors**

|                                                       | baseline    | 12 months   | 24 months   |
|-------------------------------------------------------|-------------|-------------|-------------|
| <b>n total</b>                                        | <b>441</b>  | <b>387</b>  | <b>360</b>  |
| <b>Insulin pumps</b>                                  |             |             |             |
| Medtronic MiniMed Veo Paradigm 522                    | 1 (0.2%)    | 1 (0.3%)    | 0 (0.0%)    |
| Medtronic MiniMed Veo Paradigm 722                    | 4 (0.9%)    | 1 (0.3%)    | 0 (0.0%)    |
| Medtronic MiniMed Veo Paradigm 554                    | 3 (0.7%)    | 2 (0.5%)    | 1 (0.3%)    |
| Medtronic MiniMed Veo Paradigm 754*                   | 293 (66.4%) | 209 (54.0%) | 133 (36.9%) |
| Medtronic MiniMed 640G                                | 60 (13.6%)  | 98 (25.3%)  | 157 (43.6%) |
| Roche Accu-Chek Combo                                 | 80 (18.1%)  | 76 (19.6%)  | 65 (18.1%)  |
| Roche Accu-Chek Insight                               | 0 (0.0%)    | 0 (0.0%)    | 4 (1.1%)    |
| <b>Glucose sensors</b>                                |             |             |             |
| Medtronic Enlite                                      | 348 (78.9%) | 298 (77.0%) | 278 (77.2%) |
| Dexcom G4 Platinum                                    | 93 (21.1%)  | 88 (22.7%)  | 81 (22.5%)  |
| Dexcom G5                                             | 0 (0.0%)    | 1 (0.3%)    | 1 (0.3%)    |
| <b>Combination of insulin pump and glucose sensor</b> |             |             |             |
| rtCGM + insulin pump                                  | 95 (21.5%)  | 89 (23.0%)  | 82 (22.8%)  |
| Low-glucose threshold suspend                         | 287 (65.1%) | 202 (52.2%) | 123 (34.2%) |
| Low-glucose predictive suspend                        | 59 (13.4%)  | 96 (24.8%)  | 155 (43.0%) |

Data are n (%). \*Also known as Medtronic MiniMed 530G or 630G.

**Table S2. Overview of completeness of data per variable and time point**

|                                      | baseline    | 4 months    | 8 months    | 12 months   | 24 months   |
|--------------------------------------|-------------|-------------|-------------|-------------|-------------|
| <b>n total</b>                       | <b>441</b>  | <b>417</b>  | <b>399</b>  | <b>387</b>  | <b>360</b>  |
| HbA <sub>1c</sub>                    | 439 (99.5%) | 412 (98.8%) | 370 (92.7%) | 374 (96.6%) | 351 (97.5%) |
| Hospitalizations                     | 432 (98.0%) | NA          | NA          | 370 (95.6%) | 342 (95.0%) |
| Third party help for hypoglycemia    | 421 (95.5%) | NA          | NA          | 353 (91.2%) | 317 (88.1%) |
| Hypoglycemic coma                    | 425 (96.4%) | NA          | NA          | 355 (91.7%) | 319 (88.6%) |
| Hypoglycemia with seizure            | 424 (96.1%) | NA          | NA          | 355 (91.7%) | 318 (88.3%) |
| Needing glucagon for hypoglycemia    | 425 (96.4%) | NA          | NA          | 355 (91.7%) | 319 (88.6%) |
| Help from ambulance for hypoglycemia | 426 (96.6%) | NA          | NA          | 354 (91.5%) | 319 (88.6%) |
| Work absenteeism                     | 404 (91.6%) | NA          | NA          | 350 (90.4%) | 319 (88.6%) |
| SF-36 subscales                      | 399 (90.5%) | NA          | NA          | 336 (86.8%) | 313 (86.9%) |
| PAID-SF                              | 392 (88.9%) | NA          | NA          | 327 (84.5%) | 310 (86.1%) |
| HFS-worry                            | 358 (81.2%) | NA          | NA          | 324 (83.7%) | 310 (86.1%) |
| Sensor data*                         | 307 (69.6%) | 373 (89.4%) | 299 (74.9%) | 350 (90.4%) | 300 (83.3%) |

Data are n (%). \*Baseline for this variable is the first 2 weeks after start. PAID-SF = Problem Areas in Diabetes-short form, HFS = Hypoglycemia Fear Survey, NA = not applicable

**Table S3. Number of people in each subgroup**

|                                                       | <b>baseline</b> | <b>4 months</b> | <b>8 months</b> | <b>12 months</b> | <b>24 months</b> |
|-------------------------------------------------------|-----------------|-----------------|-----------------|------------------|------------------|
| <b>n total</b>                                        | <b>441</b>      | <b>417</b>      | <b>399</b>      | <b>387</b>       | <b>360</b>       |
| <b>Impaired awareness of hypoglycemia at baseline</b> |                 |                 |                 |                  |                  |
| Yes                                                   | 193 (46.8%)     | 184 (44.1%)     | 179 (44.9%)     | 177 (45.7%)      | 167 (46.4%)      |
| No                                                    | 244 (55.3%)     | 230 (55.2%)     | 217 (54.4%)     | 208 (53.7%)      | 191 (53.1%)      |
| <b>Baseline HbA<sub>1c</sub></b>                      |                 |                 |                 |                  |                  |
| <7.0% (<53 mmol/mol)                                  | 93 (21.1%)      | 93 (22.3%)      | 85 (21.3%)      | 80 (20.7%)       | 74 (20.6%)       |
| 7.0–8.0% (53–64 mmol/mol)                             | 225 (51.0%)     | 218 (52.3%)     | 214 (53.6%)     | 209 (54.0%)      | 197 (54.7%)      |
| >8.0% (>64 mmol/mol)                                  | 118 (26.8%)     | 105 (25.2%)     | 99 (24.8%)      | 97 (25.1%)       | 88 (24.4%)       |

Data are n (%). Note: Numbers and percentages at the different time points denote how many people from the initial grouping are still in follow-up.

**Table S4. Baseline characteristics**

| <b>General characteristics</b>                                    |             |
|-------------------------------------------------------------------|-------------|
| Total number of participants                                      | 441 (100%)  |
| Female                                                            | 257 (58.3%) |
| Caucasian                                                         | 429 (97.3%) |
| Age (years)                                                       | 41.9 (12.5) |
| BMI (kg/m <sup>2</sup> )                                          | 25.3 (3.7)  |
| Education                                                         |             |
| Higher*                                                           | 272 (61.7%) |
| No higher                                                         | 150 (34.0%) |
| Unknown                                                           | 19 (4.3%)   |
| Living alone                                                      | 47 (10.7%)  |
| <b>Diabetes-related characteristics</b>                           |             |
| Diabetes duration (years)                                         | 22.3 (11.6) |
| Age at diagnosis (years)                                          | 19.1 (11.4) |
| Insulin pump therapy                                              | 441 (100%)  |
| Duration (years)                                                  | 5.6 (4.5)   |
| Microvascular complications                                       | 146 (33.1%) |
| Retinopathy                                                       | 123 (27.9%) |
| Neuropathy†                                                       | 63 (14.3%)  |
| Nephropathy                                                       | 47 (10.7%)  |
| Macrovascular complications                                       | 18 (4.1%)   |
| Acute myocardial infarction                                       | 9 (2.0%)    |
| Peripheral arterial disease                                       | 5 (1.1%)    |
| Cerebrovascular accident                                          | 4 (0.9%)    |
| Heart failure                                                     | 2 (0.5%)    |
| Impaired awareness of hypoglycemia‡                               | 193 (43.8%) |
| Symptoms <50 mg/dL (2.8 mmol/L)                                   | 131 (29.7%) |
| No symptoms <50 mg/dL (2.8 mmol/L)                                | 53 (12.0%)  |
| Unknown                                                           | 9 (2.0%)    |
| HbA <sub>1c</sub> (%)                                             | 7.6 (0.9)   |
| HbA <sub>1c</sub> (mmol/mol)                                      | 60 (9.8)    |
| Self-reported daily home glucose-meter readings (number per day)‡ | 5.6 (2.1)   |
| <b>rtCGM-related characteristics</b>                              |             |
| Indication for rtCGM therapy                                      |             |
| Hypoglycemia                                                      | 247 (56.0%) |
| Insufficient and variable glycemic control                        | 118 (26.8%) |
| Pregnancy                                                         | 58 (13.2%)  |
| Other                                                             | 11 (2.5%)   |
| Unknown                                                           | 7 (1.5%)    |
| rtCGM-use before reimbursement                                    |             |
| No                                                                | 234 (53.1%) |
| Sporadically                                                      | 84 (19.0%)  |
| Continuously ≤4 months                                            | 56 (12.7%)  |
| Continuously >4 months                                            | 67 (15.2%)  |

Data are mean (SD) or n (%). \*Defined as graduated from university or college. †Peripheral and/or autonomic neuropathy. ‡Based on questionnaire filled out by patients or the clinical team.

**Table S5. Quality of life scores**

|                                           | baseline |             | 12 months |             | p-value* | 24 months |             | p-value* |
|-------------------------------------------|----------|-------------|-----------|-------------|----------|-----------|-------------|----------|
| <b>Total population</b>                   |          |             |           |             |          |           |             |          |
| <b>SF-36</b>                              |          |             |           |             |          |           |             |          |
| Physical functioning                      | 80.5     | (78.6-82.5) | 83.5      | (81.5-85.6) | <0.0001  | 83.2      | (81.2-85.3) | 0.004    |
| Role-physical                             | 63.7     | (59.6-67.8) | 68.7      | (64.5-72.9) | <0.0001  | 68.7      | (64.5-72.9) | <0.0001  |
| Bodily pain                               | 72.5     | (67.9-77.1) | 75.6      | (70.9-80.3) | 0.009    | 73.7      | (68.9-78.4) | 0.366    |
| General health                            | 50.1     | (46.7-53.6) | 54.6      | (51.1-58.1) | <0.0001  | 53.6      | (50.0-57.1) | <0.0001  |
| Vitality                                  | 56.1     | (53.5-58.7) | 58.5      | (55.8-61.2) | 0.009    | 57.3      | (54.6-60.0) | 0.212    |
| Social functioning                        | 72.3     | (69.3-75.3) | 78.1      | (75.1-81.1) | <0.0001  | 78.2      | (75.0-81.3) | <0.0001  |
| Role-emotional                            | 72.9     | (69.4-76.3) | 77.0      | (73.5-80.5) | 0.006    | 75.5      | (72.1-79.0) | 0.087    |
| Mental health                             | 67.0     | (64.9-69.2) | 69.7      | (67.5-72.0) | 0.003    | 68.6      | (66.3-70.9) | 0.117    |
| <b>PAID-SF</b>                            | 7.4      | (6.8-8.1)   | 6.4       | (5.7-7.0)   | <0.0001  | 6.2       | (5.5-6.8)   | <0.0001  |
| <b>HFS-worry</b>                          | 18.3     | (16.7-19.9) | 14.7      | (13.2-16.3) | <0.0001  | 14.1      | (12.5-15.7) | <0.0001  |
| <b>Impaired awareness of hypoglycemia</b> |          |             |           |             |          |           |             |          |
| <b>SF-36</b>                              |          |             |           |             |          |           |             |          |
| Physical functioning                      | 77.2     | (72.9-81.6) | 81.7      | (77.3-86.1) | <0.0001  | 81.1      | (76.7-85.6) | <0.0001  |
| Role-physical                             | 59.3     | (53.5-65.1) | 66.4      | (60.5-72.3) | 0.002    | 66.7      | (60.8-72.6) | 0.002    |
| Bodily pain                               | 68.5     | (63.0-73.9) | 73.4      | (67.9-78.9) | 0.007    | 71.0      | (65.5-76.5) | 0.191    |
| General health                            | 47.6     | (42.4-52.7) | 53.3      | (48.1-58.5) | <0.0001  | 51.5      | (46.3-56.6) | 0.012    |
| Vitality                                  | 53.8     | (48.9-58.7) | 58.5      | (53.6-63.5) | 0.001    | 58.2      | (53.2-63.1) | 0.006    |
| Social functioning                        | 67.9     | (62.7-73.0) | 76.0      | (70.8-81.2) | <0.0001  | 77.3      | (72.0-82.5) | <0.0001  |
| Role-emotional                            | 68.6     | (62.5-74.7) | 74.2      | (68.0-80.4) | 0.024    | 72.9      | (66.9-78.9) | 0.098    |
| Mental health                             | 65.8     | (61.2-70.4) | 68.9      | (64.2-73.6) | 0.030    | 67.6      | (62.9-72.4) | 0.239    |
| <b>PAID-SF</b>                            | 7.9      | (7.0-8.8)   | 6.3       | (5.4-7.2)   | <0.0001  | 6.2       | (5.3-7.1)   | <0.0001  |
| <b>HFS-worry</b>                          | 20.8     | (19.1-22.5) | 16.6      | (15.0-18.1) | <0.0001  | 15.4      | (13.8-16.9) | <0.0001  |
| <b>Normal awareness of hypoglycemia</b>   |          |             |           |             |          |           |             |          |
| <b>SF-36</b>                              |          |             |           |             |          |           |             |          |
| Physical functioning                      | 83.4     | (80.9-85.8) | 85.3      | (82.5-88.0) | 0.087    | 85.2      | (82.5-88.0) | 0.110    |
| Role-physical                             | 68.1     | (62.4-73.8) | 71.4      | (66.0-76.7) | 0.034    | 71.4      | (66.1-76.7) | 0.051    |
| Bodily pain                               | 77.1     | (74.0-80.2) | 78.8      | (75.4-82.3) | 0.262    | 77.5      | (73.8-81.2) | 0.824    |
| General health                            | 52.9     | (48.8-57.1) | 56.5      | (52.3-60.7) | 0.003    | 56.2      | (51.9-60.4) | 0.009    |
| Vitality                                  | 58.6     | (56.1-61.1) | 59.1      | (56.3-62.0) | 0.663    | 57.4      | (54.6-60.2) | 0.357    |
| Social functioning                        | 76.4     | (73.2-79.5) | 80.3      | (77.1-83.5) | 0.015    | 79.3      | (75.6-82.9) | 0.110    |
| Role-emotional                            | 76.1     | (72.7-79.5) | 79.0      | (75.5-82.5) | 0.128    | 77.4      | (73.6-81.2) | 0.507    |
| Mental health                             | 68.5     | (66.3-70.7) | 70.7      | (68.3-73.2) | 0.054    | 69.5      | (67.0-72.1) | 0.401    |
| <b>PAID-SF</b>                            | 6.9      | (6.4-7.5)   | 6.4       | (5.7-7.0)   | 0.020    | 6.0       | (5.4-6.6)   | <0.0001  |
| <b>HFS-worry</b>                          | 16.1     | (14.1-18.2) | 13.1      | (11.1-15.2) | <0.0001  | 12.9      | (10.9-15.0) | <0.0001  |

Data are least-squares mean (95% confidence interval). SF-36 = Short Form 36, scores range from 0-100 with higher scores indicating a better perception of quality of life; PAID-SF = Problem Areas in Diabetes–Short Form, scores range from 0-20 with higher scores suggesting greater diabetes-related emotional distress; HFS-worry = Hypoglycemia Fear Survey – worry subscale, scores range from 0-52 with higher scores representing more hypoglycemia-related concerns and fears. \*P-value for the change versus baseline.

**Table S6. People meeting glycemic targets with and without impaired awareness of hypoglycemia**

|                                                                                     | baseline    | 4 months    | 8 months    | 12 months   | 24 months   | p-value‡ |
|-------------------------------------------------------------------------------------|-------------|-------------|-------------|-------------|-------------|----------|
| <b>Impaired awareness of hypoglycemia</b>                                           |             |             |             |             |             |          |
| <b>Clinical consensus targets</b>                                                   |             |             |             |             |             |          |
| HbA <sub>1c</sub> <7% (<53 mmol/mol)                                                | 43 (22.3%)  | 69 (38.1%)  | 58 (34.9%)  | 59 (34.5%)  | 52 (32.1%)  | <0.0001  |
| <1% of time spent <54 mg/dL (<3.0 mmol/L)*                                          | 74 (56.5%)  | 95 (58.3%)† | 85 (65.9%)  | 88 (55.3%)† | 89 (64.0%)† | 0.053    |
| <4% of time spent <70 mg/dL (<3.9 mmol/L)*                                          | 62 (47.3%)† | 82 (50.3%)† | 78 (60.5%)  | 81 (51.3%)† | 81 (57.9%)† | 0.043    |
| >70% of TIR*                                                                        | 38 (29.0%)  | 38 (23.3%)  | 29 (22.5%)  | 35 (22.2%)  | 35 (25.0%)  | 0.603    |
| <25% of time spent >180 mg/dL (>10.0 mmol/L)*                                       | 44 (33.6%)  | 40 (24.5%)  | 28 (21.7%)  | 39 (24.7%)  | 35 (25.0%)  | 0.139    |
| <5% of time spent >250 mg/dL (>13.9 mmol/L)*                                        | 45 (34.4%)  | 44 (27.0%)  | 30 (23.3%)  | 41 (25.9%)  | 39 (28.3%)  | 0.349    |
| <b>Composite endpoints</b>                                                          |             |             |             |             |             |          |
| HbA <sub>1c</sub> <7% (<53 mmol/mol) and <1% of time spent <54 mg/dL (<3.0 mmol/L)* | 18 (10.1%)  | 28 (16.5%)  | 20 (13.6%)  | 27 (16.4%)  | 27 (17.4%)  | 0.010    |
| HbA <sub>1c</sub> <7% (<53 mmol/mol) and no severe hypoglycemia                     | 17 (8.8%)   | NA          | NA          | 44 (26.0%)  | 32 (20.5%)† | <0.0001  |
| >70% TIR and <1% of time spent <54 mg/dL (<3.0 mmol/L)*                             | 25 (19.1%)  | 22 (13.5%)  | 20 (15.5%)  | 21 (13.2%)  | 25 (17.9%)  | 0.227    |
| >70% TIR and no severe hypoglycemia*                                                | 12 (7.1%)†  | NA          | NA          | 25 (15.6%)  | 23 (15.8%)  | 0.014    |
| <b>Normal awareness of hypoglycemia</b>                                             |             |             |             |             |             |          |
| <b>Clinical consensus targets</b>                                                   |             |             |             |             |             |          |
| HbA <sub>1c</sub> <7% (<53 mmol/mol)                                                | 53 (21.9%)  | 84 (36.8%)  | 74 (36.8%)  | 60 (29.9%)  | 63 (33.7%)  | <0.0001  |
| <1% of time spent <54 mg/dL (<3.0 mmol/L)*                                          | 111 (64.2%) | 143 (68.8%) | 127 (75.6%) | 133 (70.4%) | 124 (79.5%) | 0.020    |
| <4% of time spent <70 mg/dL (<3.9 mmol/L)*                                          | 105 (60.7%) | 137 (65.9%) | 114 (68.3%) | 131 (69.3%) | 115 (73.2%) | 0.023    |
| >70% of TIR*                                                                        | 56 (32.4%)  | 65 (31.3%)  | 52 (31.1%)  | 49 (25.9%)  | 41 (26.1%)  | 0.113    |
| <25% of time spent >180 mg/dL (>10.0 mmol/L)*                                       | 58 (33.5%)  | 64 (30.8%)  | 52 (31.1%)  | 52 (27.5%)  | 39 (24.8%)  | 0.114    |
| <5% of time spent >250 mg/dL (>13.9 mmol/L)*                                        | 63 (36.4%)  | 68 (32.7%)  | 53 (31.7%)  | 64 (33.9%)  | 44 (28.2%)  | 0.285    |
| <b>Composite endpoints</b>                                                          |             |             |             |             |             |          |
| HbA <sub>1c</sub> <7% (<53 mmol/mol) and <1% of time spent <54 mg/dL (<3.0 mmol/L)* | 20 (8.9%)   | 45 (20.5%)  | 37 (19.9%)  | 32 (16.0%)  | 38 (21.5%)  | <0.0001  |
| HbA <sub>1c</sub> <7% (<53 mmol/mol) and no severe hypoglycemia                     | 31 (13.0%)  | NA          | NA          | 61 (31.0%)  | 55 (29.9%)  | <0.0001  |
| >70% TIR and <1% of time spent <54 mg/dL (<3.0 mmol/L)*                             | 36 (20.8%)  | 42 (20.2%)  | 37 (22.2%)  | 34 (18.0%)  | 29 (18.5%)  | 0.448    |
| >70% TIR and no severe hypoglycemia*                                                | 42 (22.0%)  | NA          | NA          | 39 (21.1%)  | 37 (23.4%)  | 0.875    |

Data are n (% of total number of people in that subgroup with data). TIR = time in range (70-180 mg/dL; 3.9-10.0 mmol/mol), NA = not applicable \*Baseline for this variable is the first 2 weeks after start. †Indicates a significant between-group difference compared to people with normal awareness of hypoglycemia. ‡P-value for the evolution over the follow-up period.

Figure S1. Overview of people with type 1 diabetes in the 24-month RESCUE study.

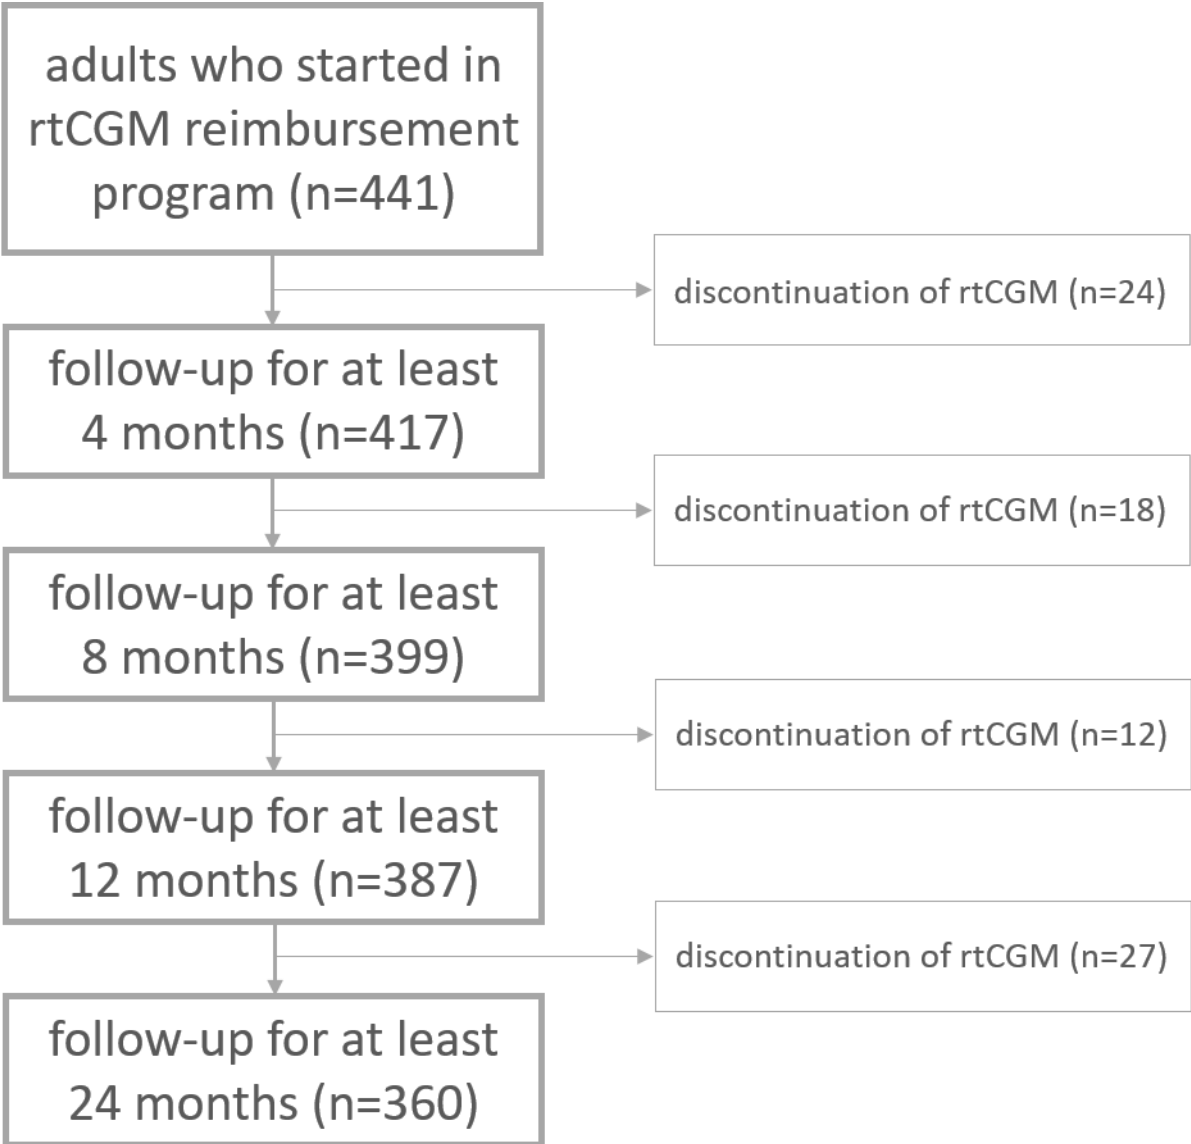



## List of RESCUE 24-month investigators

|                              |                                                 |
|------------------------------|-------------------------------------------------|
| Charleer Sara, MSc           | University Hospitals Leuven – KU Leuven, Leuven |
| De Block Christophe, MD, PhD | University Hospital Antwerp, Edegem             |
| Gillard Pieter, MD, PhD      | University Hospitals Leuven – KU Leuven, Leuven |
| Keymeulen Bart, MD, PhD      | University Hospital Brussels, Brussels          |
| Lowyck Ine, MD               | Ziekenhuis Oost-Limburg, Genk                   |
| Mathieu Chantal, MD, PhD     | University Hospitals Leuven – KU Leuven, Leuven |
| Mullens Annelies, MD         | Jessa Ziekenhuis, Hasselt                       |
| Nobels Frank, MD, PhD        | OLV Hospital, Aalst                             |
| Radermecker Regis P, MD, PhD | CHU Liège, Liege                                |
| Scarnière Denis, MD          | Grand Hôpital de Charleroi, Charleroi           |
| Spincemaille Katrien, MD     | AZ Delta, Roeselare                             |
| Strivay Marie, MD            | CHR la Citadelle Liège, Liege                   |
| Taes Youri, MD, PhD          | AZ Sint-Jan, Bruges                             |
| Vercammen Chris, MD          | Imelda Hospital, Bonheiden                      |
| Weber Eric, MD               | Cliniques du Sud Luxembourg – Vivalia, Arlon    |
